# Supplementary material for: A hierarchical carbon nanotube/SiO2 nanoparticle network induced superhydrophobic and conductive coating for wearable strain sensors with superior sensitivity and ultra-low detection limit
Source: Royal Society of Chemistry journal article supplement (doi:10.1039/c8tc06565a), 2019-01-01
Supplement: c8tc06565a1.pdf [file c8tc06565a1.pdf]

## Hierarchical carbon nanotubes/SiO<sub>2</sub> nanoparticle network induced superhydrophobic and conductive coating for wearable strain sensors with superior sensitivity and ultra-low detection limit

Jiefeng Gao\*<sup>a,b</sup>, Lisheng Wu<sup>a</sup>, Zheng Guo<sup>a</sup>, Jiye Li<sup>a</sup>, Cong Xu<sup>a</sup> and Huaiguo Xue<sup>a</sup>

<sup>a</sup> School of Chemistry and Chemical Engineering, Yangzhou University, Yangzhou, Jiangsu, 225002, China

<sup>b</sup> State Key Laboratory of Polymer Materials Engineering Sichuan University, Chengdu, Sichuan 610065, P. R. China

Corresponding author: jfgao@yzu.edu.cn

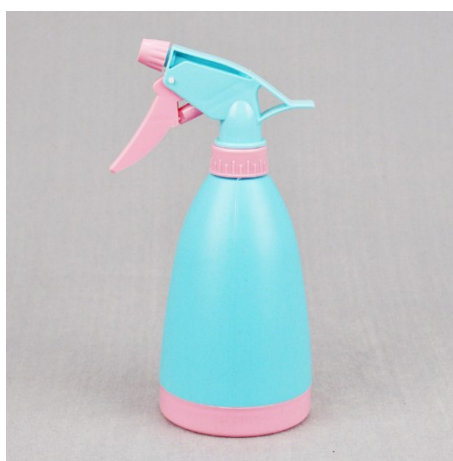

Fig. S1 The photograph of the watering can used for spraying coating

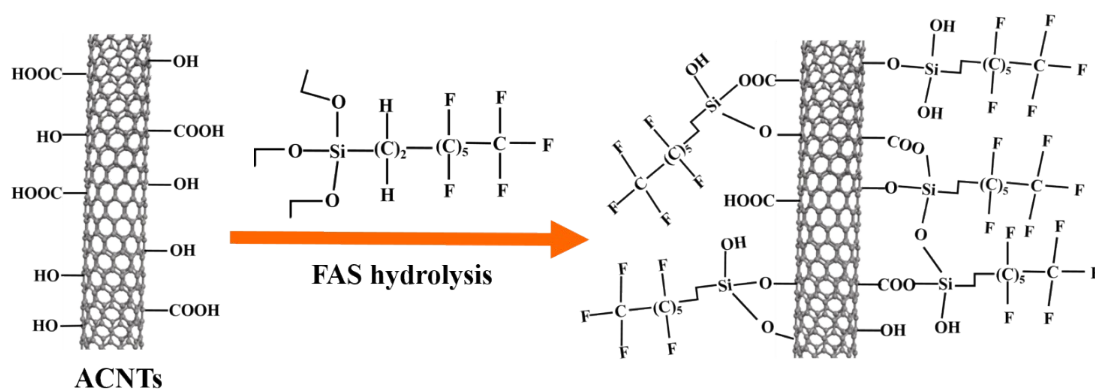

Fig. S2 Schematic diagram of the mechanism of carbon nanotubes fluorinated by FAS.

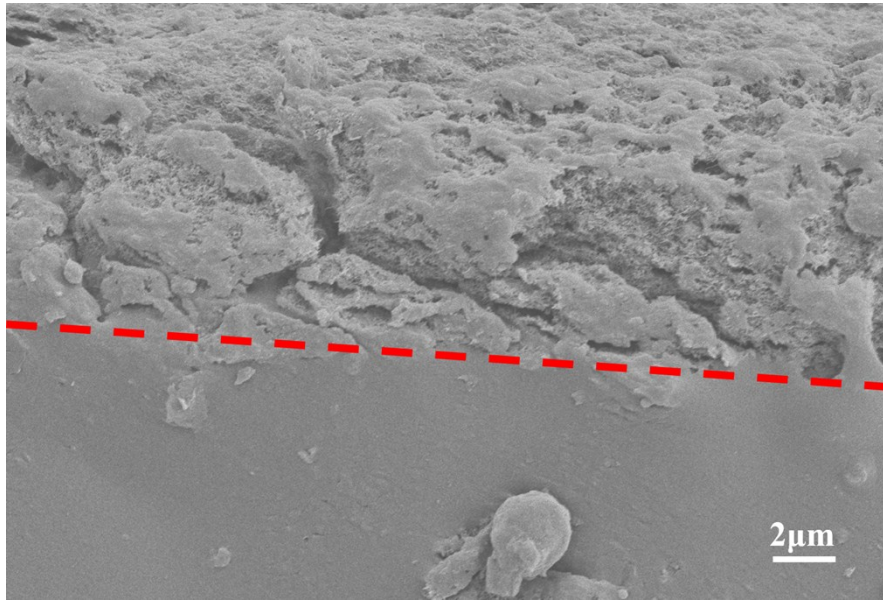

**Fig.S3** SEM image of cross section for the coating showing the thickness.

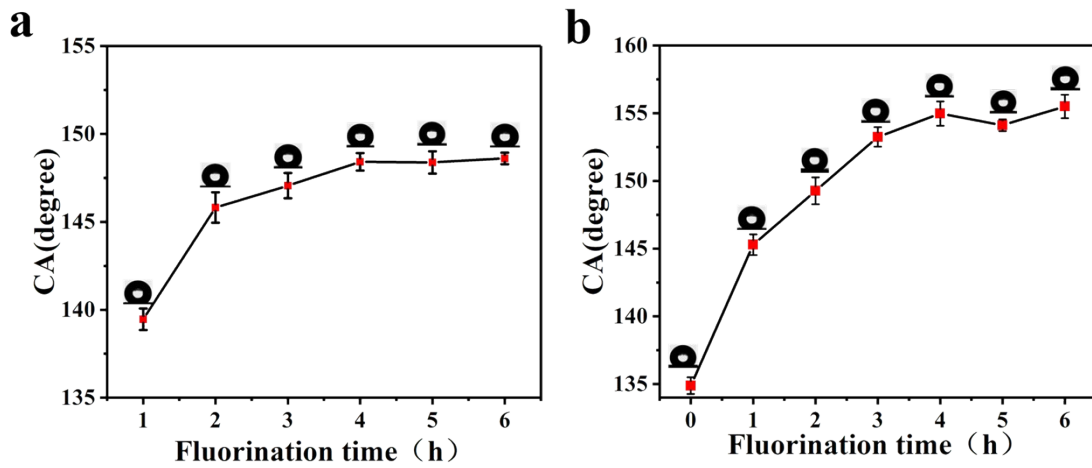

**Fig.S4** Contact angle (CA) of samples as a function of fluorination time. (a) Without addition of SiO<sub>2</sub>. (b) With the addition of SiO<sub>2</sub> possessing the weight percentage of 25 wt%.

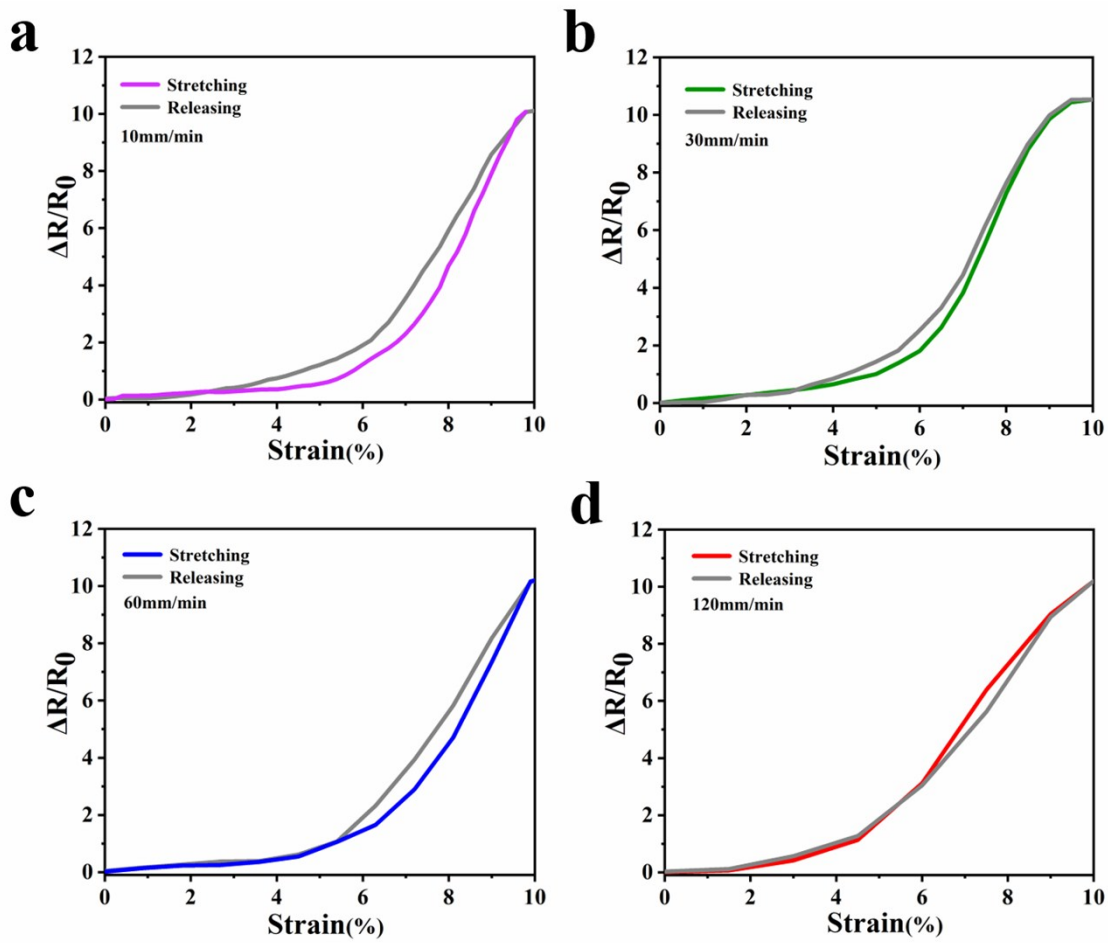

**Fig.S5** The graphs of  $\Delta R/R_0$  vs strain for the different strain rates. (a) 10mm/min, (b) 30mm/min, (c) 60mm/min, (d) 120mm/min.

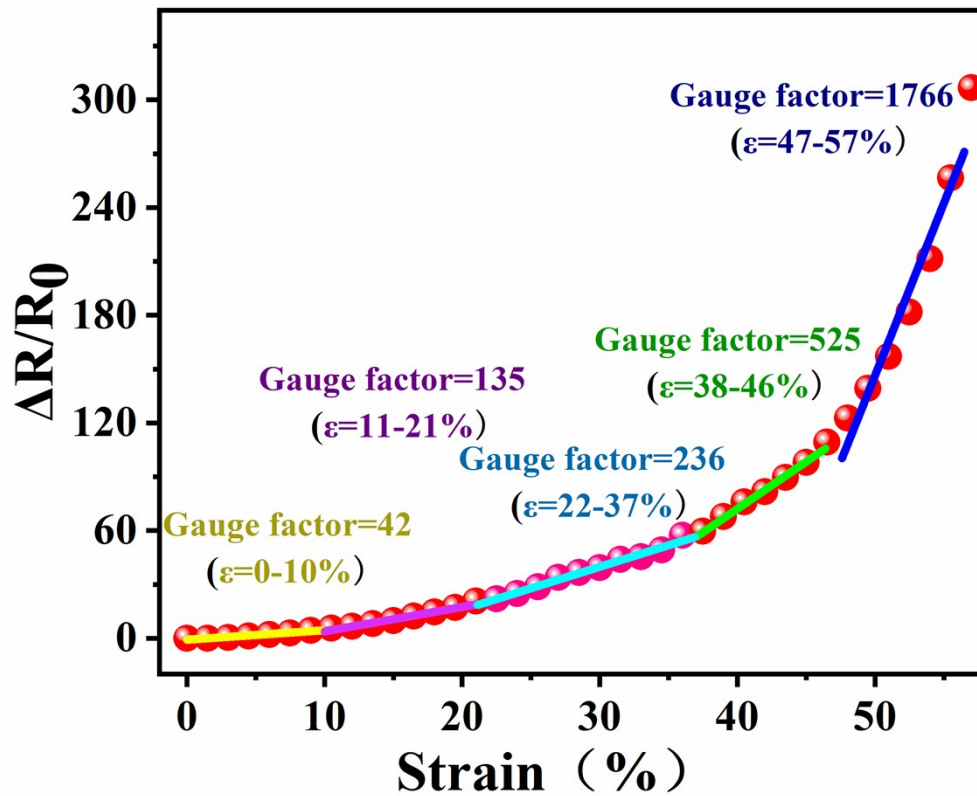

Fig.S6 Gauge factors of the FCNTs/SiO<sub>2</sub> strain sensor under different strain regions

**Table S1** Comparison of the gauge factor FCNTs/SiO<sub>2</sub> strain sensor with coating based strain sensors under different strain range

| No. | Sensors                              | Gauge Factor under different strain range                                            | Reference        |
|-----|--------------------------------------|--------------------------------------------------------------------------------------|------------------|
| 1   | MWCNT/TPE coating                    | 15.6 (ε: 0–6%), 8.1(ε:15–50%), 5.4(ε: 55–76%)                                        | Ref. 1           |
| 2   | SWCNTs/PDMS sensor                   | 161(ε: 0–2%), 9.8(ε: 2–15%), 0.58(ε: 15–150%)                                        | Ref. 2           |
| 3   | Graphite/silk fiber sensor           | 1450 (ε: 0–15%)                                                                      | Ref. 3           |
| 4   | Graphene/PU coating                  | 86.8(ε: 0–50%)                                                                       | Ref. 4           |
| 5   | Fish scale-like rGO/tape film        | 16.2(ε: 0–60%), 150(ε: 60-82%)                                                       | Ref. 5           |
| 6   | Graphene/PVP coating                 | 3500(ε:0–5%),600(ε:5–25%)                                                            | Ref. 6           |
| 7   | P(VDF-TrFE)/Ag nanowires sensor      | 5.3(ε: 0–25%)                                                                        | Ref. 7           |
| 8   | <b>FCNTs/SiO<sub>2</sub> coating</b> | <b>42(ε: 0–10%), 135(ε: 11-21%), 236(ε: 22–37%), 525(ε: 38–46%), 1766(ε: 47–57%)</b> | <b>This work</b> |

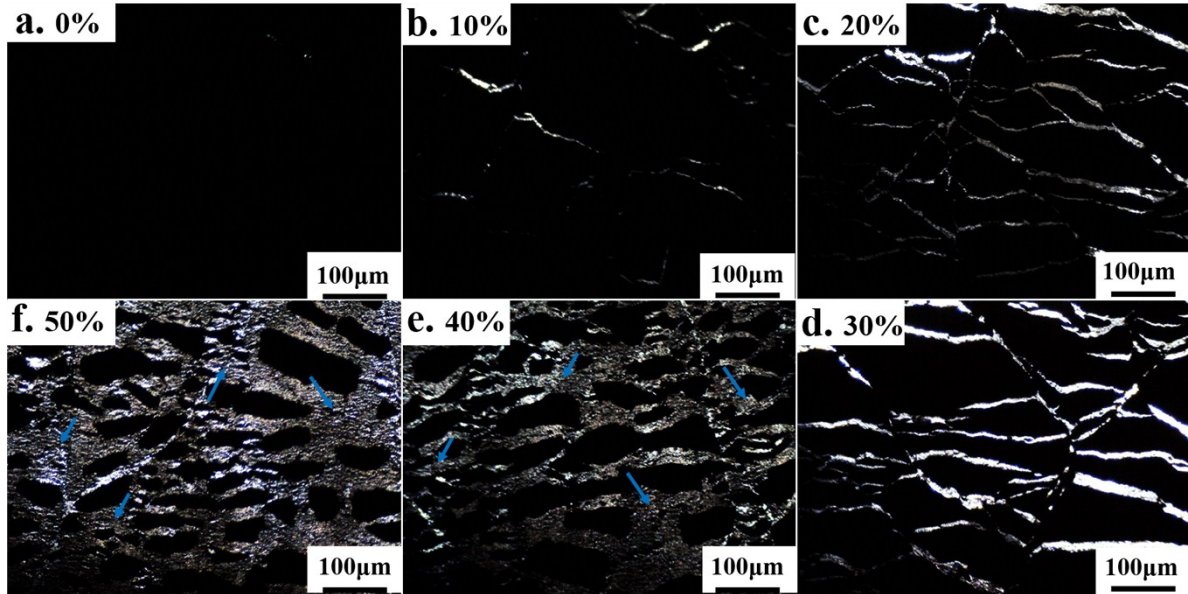

**Fig.S7** Images under optical microscope of surface morphology of FCNTs/SiO<sub>2</sub> coatings under different strain during stretching. (a) 0%, (b) 10%, (c) 20 %, (d) 30%, (e) 40% and (f) 50%.

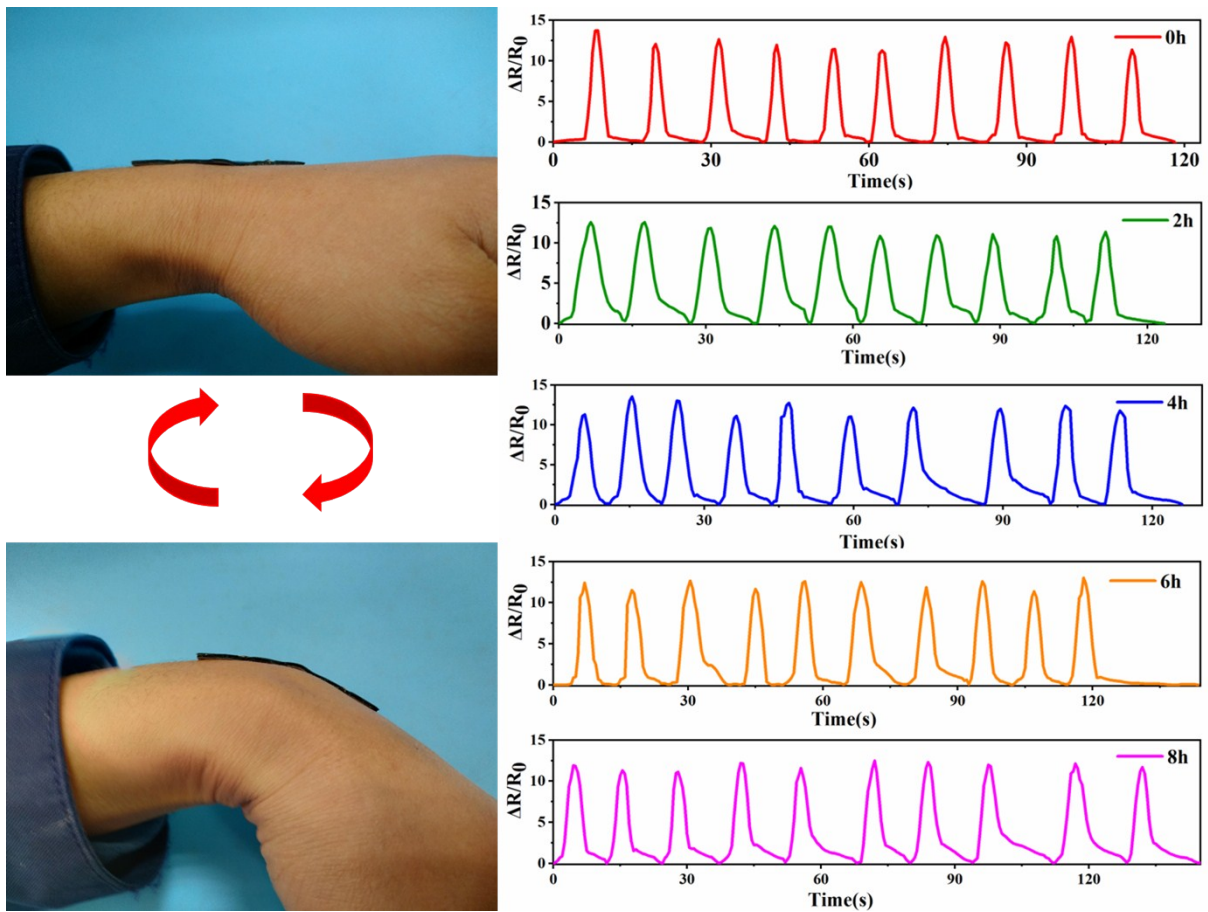

**Fig.S8** The wrist bending test of the sensor after immersed in an acid solution of pH=1 for different times of 0h,2h,4h,6h,8h.

## References

1. L. Li, Y. Bai, L. Li, S. Wang and T. Zhang, *Adv. Mater.*, 2017, **29**,1702517.
2. Z. Liu, D. Qi, P. Guo, Y. Liu, B. Zhu, H. Yang, Y. Liu, B. Li, C. Zhang, J. Yu, B. Liedberg and X. Chen, *Adv. Mater.*, 2015, **27**, 6230-6237.
3. M. Zhang, C. Wang, Q. Wang, M. Jian and Y. Zhang, *ACS Appl. Mater. Interfaces*, 2016, **8**, 20894-20899.
4. X. Li, T. Hua and B. Xu, *Carbon*, 2017, **118**, 686-698.
5. Q. Liu, J. Chen, Y. Li and G. Shi, *ACS Nano*, 2016, **10**, 7901-7906.
6. Y. Liu, D. Zhang, K. Wang, Y. Liu and Y. Shang, *Composites, Part A*, 2016, **80**, 95-103.
7. S. Chen, Z. Lou, D. Chen, K. Jiang and G. Shen, *Adv. Mater. Technol.*, 2016, **1**, 1600136.
